# Supplementary material
Source: ML conference proceedings conference paper supplement (https://openreview.net/forum?id=ubZyjXJKhm)

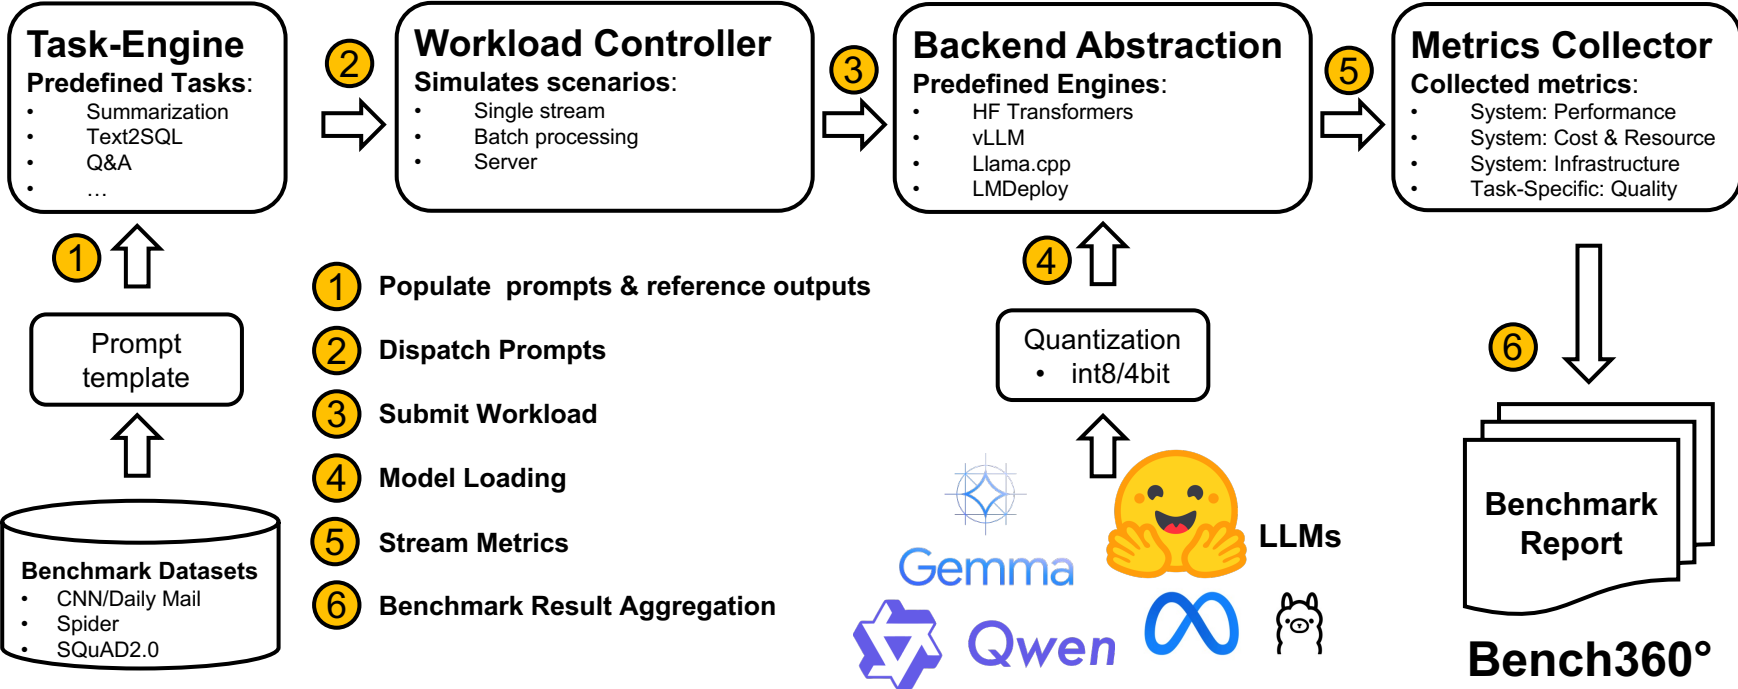

Supplement: supplementary_material [file bench360-overview.pdf › bench360-main/benchmark/docs/bench360-overview.pdf]
